# Supplementary material for: A nanocomposite gel based on 1D coordination polymers and nanoclusters reversibly gelate water upon heating
Source: Royal Society of Chemistry journal article supplement (doi:10.1039/c2ra22549b), 2012-01-01
Supplement: c2ra22549b.pdf [file c2ra22549b.pdf]

**Supporting Information**  
*For*  
**A Nanocomposite Gel Based on 1D Coordination Polymers and Nanoclusters**  
**Reversibly Gelate Water upon Heating**

*Jin-Ji Wu, Man-Li Cao, Jian-Yong Zhang\* and Bao-Hui Ye\**

MOE Key Laboratory of Bioinorganic and Synthetic Chemistry, School of Chemistry and  
Chemical Engineering, Sun Yat-Sen University, Guangzhou 510275, China; Department of  
Chemistry, Guangdong University of Education, Guangzhou 510303, China

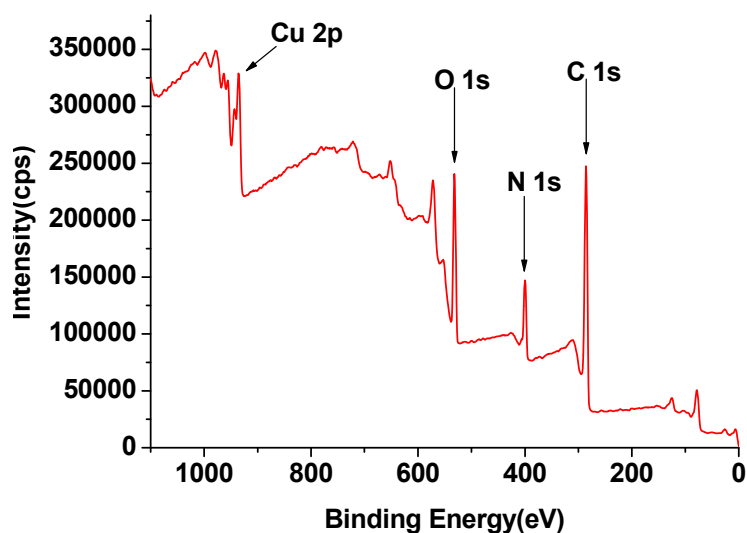

**Fig. S1.** XPS survey of complex  $3 \cdot \text{NO}_3$ . No peak is found in the range from 770 to 800 eV indicating that all the metal ions in  $3 \cdot \text{NO}_3$  are copper.<sup>8</sup>

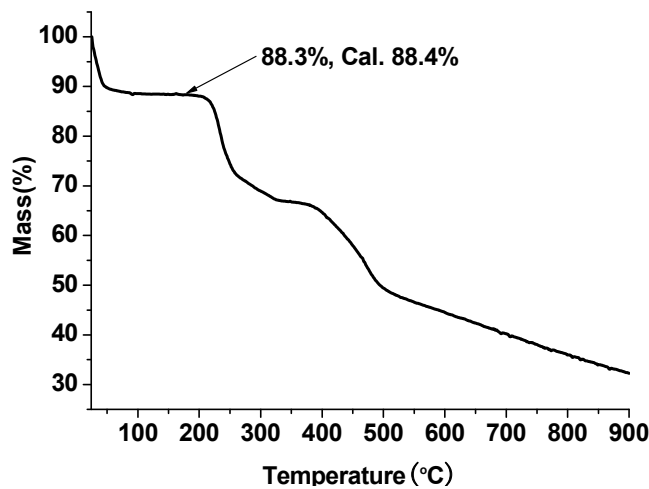

**Fig. S2.** TGA curve of  $3 \cdot \text{NO}_3$ , revealing that there were 32 lattice water molecules in  $3 \cdot \text{NO}_3$ .

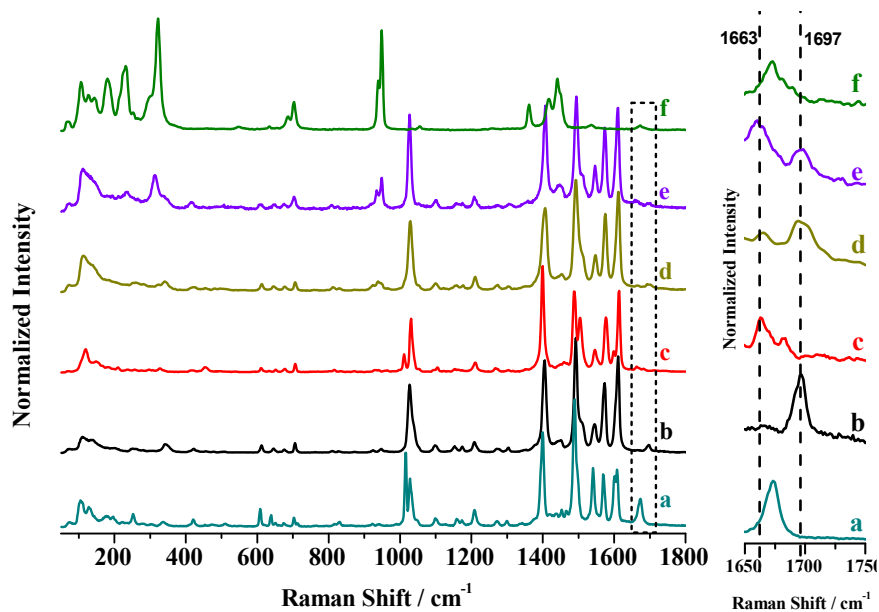

**Fig. S3.** Comparison of Raman spectra of **2** (a), **3·NO<sub>3</sub>** (b), **1** (c), **S** (d), **G** (e), **Cu(OAc)<sub>2</sub>·H<sub>2</sub>O** (f); and the magnified region of 1650 – 1750 cm<sup>-1</sup> (right).

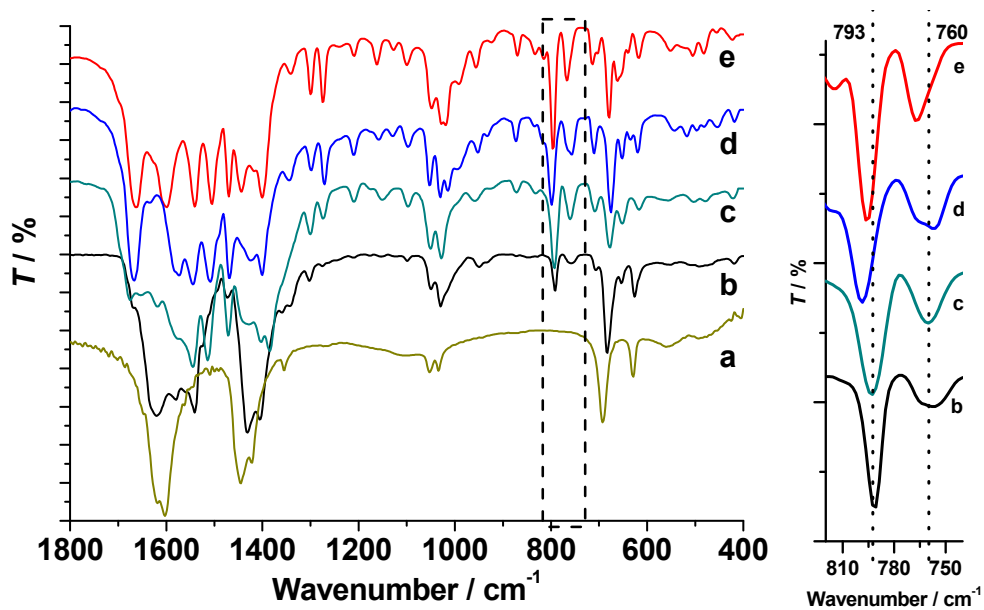

**Figure S4.** Comparison of IR spectra of **Cu(OAc)<sub>2</sub>·H<sub>2</sub>O** (a), filtrate (b), **3·NO<sub>3</sub>** (c), **1** (d), **2** (e); and the magnified region of 820 – 740 cm<sup>-1</sup> for b, c, d and e (right).

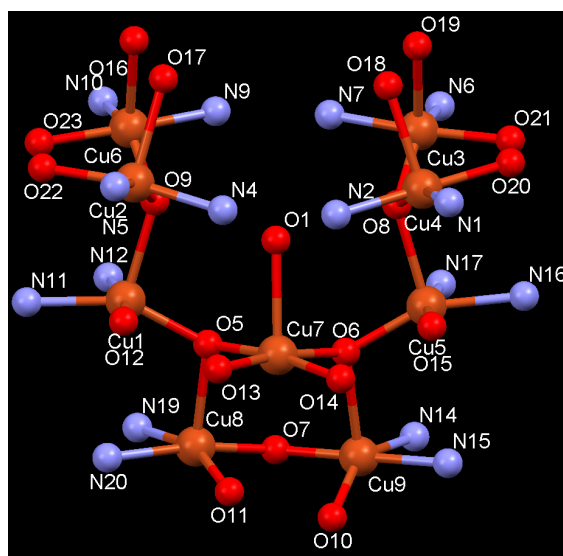

**Figure S3.** Representation of the inner coordination spheres of Cu<sub>9</sub> cluster for complex **3**·NO<sub>3</sub> (only atoms in the coordination geometries of the metal centers was present for clarity).

**Table S2.** Selected bond lengths involving the coordination geometries of the metal centers.

| Atom | Atom | Length/Å | Atom | Atom | Length/Å |
|------|------|----------|------|------|----------|
| Cu1  | O9   | 2.204(2) | Cu5  | N16  | 2.032(3) |
| Cu1  | O5   | 1.971(2) | Cu5  | N17  | 2.012(3) |
| Cu1  | O12  | 1.929(3) | Cu6  | O9   | 1.973(2) |
| Cu1  | N11  | 2.048(3) | Cu6  | O16  | 2.139(3) |
| Cu1  | N12  | 2.004(3) | Cu6  | O23  | 1.934(3) |
| Cu2  | O9   | 1.932(2) | Cu6  | N10  | 2.058(3) |
| Cu2  | O22  | 1.965(3) | Cu6  | N9   | 1.990(3) |
| Cu2  | N5   | 2.019(3) | Cu7  | O1   | 2.396(2) |
| Cu2  | N4   | 2.053(3) | Cu7  | O6   | 1.941(2) |
| Cu2  | O17  | 2.237(2) | Cu7  | O5   | 1.953(2) |
| Cu3  | O8   | 1.973(2) | Cu7  | O14  | 1.970(3) |
| Cu3  | O19  | 2.144(3) | Cu7  | O13  | 1.968(3) |
| Cu3  | O21  | 1.943(3) | Cu8  | O5   | 2.281(2) |
| Cu3  | N6   | 2.056(3) | Cu8  | N20  | 2.030(3) |
| Cu3  | N7   | 1.998(3) | Cu8  | N19  | 2.038(3) |
| Cu4  | O8   | 1.937(2) | Cu8  | O7   | 1.886(3) |
| Cu4  | O20  | 1.957(3) | Cu8  | O11  | 1.966(3) |
| Cu4  | O18  | 2.264(3) | Cu9  | O6   | 2.360(2) |
| Cu4  | N2   | 2.037(3) | Cu9  | N14  | 2.040(3) |
| Cu4  | N1   | 2.013(3) | Cu9  | O10  | 1.955(3) |
| Cu5  | O8   | 2.243(2) | Cu9  | O7   | 1.895(3) |
| Cu5  | O6   | 1.951(2) | Cu9  | N15  | 2.013(3) |
| Cu5  | O15  | 1.938(3) |      |      |          |

**Table S3.** Selected bond angles involving the coordination geometries of the metal centers.

| Atom | Atom | Atom | Angle/°    | Atom | Atom | Atom | Angle/°    |
|------|------|------|------------|------|------|------|------------|
| O5   | Cu1  | O9   | 103.80(9)  | O15  | Cu5  | N16  | 88.38(12)  |
| O5   | Cu1  | N11  | 148.70(11) | O15  | Cu5  | N17  | 168.17(12) |
| O5   | Cu1  | N12  | 93.60(11)  | N16  | Cu5  | O8   | 100.29(11) |

---

|     |     |     |            |     |     |                  |            |
|-----|-----|-----|------------|-----|-----|------------------|------------|
| O12 | Cu1 | O9  | 90.32(10)  | N17 | Cu5 | O8               | 92.25(10)  |
| O12 | Cu1 | O5  | 96.98(11)  | N17 | Cu5 | N16              | 79.81(13)  |
| O12 | Cu1 | N11 | 88.77(12)  | O9  | Cu6 | O16              | 109.02(10) |
| O12 | Cu1 | N12 | 168.36(12) | O9  | Cu6 | N10              | 144.56(11) |
| N11 | Cu1 | O9  | 106.93(10) | O9  | Cu6 | N9               | 97.05(11)  |
| N12 | Cu1 | O9  | 91.86(10)  | O23 | Cu6 | O9               | 90.79(11)  |
| N12 | Cu1 | N11 | 79.65(12)  | O23 | Cu6 | O16              | 93.85(11)  |
| O9  | Cu2 | O22 | 93.08(10)  | O23 | Cu6 | N10              | 89.00(12)  |
| O9  | Cu2 | N5  | 166.11(12) | O23 | Cu6 | N9               | 168.55(12) |
| O9  | Cu2 | N4  | 95.00(11)  | N10 | Cu6 | O16              | 106.35(11) |
| O9  | Cu2 | O17 | 101.01(10) | N9  | Cu6 | O16              | 91.47(11)  |
| O22 | Cu2 | N5  | 90.49(12)  | N9  | Cu6 | N10              | 79.76(12)  |
| O22 | Cu2 | N4  | 167.78(12) | O6  | Cu7 | O1               | 93.44(9)   |
| O22 | Cu2 | O17 | 97.16(10)  | O6  | Cu7 | O5               | 94.58(10)  |
| N5  | Cu2 | N4  | 79.56(12)  | O6  | Cu7 | O14              | 90.76(11)  |
| N5  | Cu2 | O17 | 91.84(11)  | O6  | Cu7 | O13              | 170.42(11) |
| N4  | Cu2 | O17 | 90.29(11)  | O5  | Cu7 | O1               | 87.27(9)   |
| O8  | Cu3 | O19 | 107.35(10) | O5  | Cu7 | O14              | 170.63(11) |
| O8  | Cu3 | N6  | 142.24(11) | O5  | Cu7 | O13              | 92.96(11)  |
| O8  | Cu3 | N7  | 97.04(11)  | O14 | Cu7 | O1               | 100.12(10) |
| O21 | Cu3 | O8  | 92.35(11)  | O13 | Cu7 | O1               | 92.82(10)  |
| O21 | Cu3 | O19 | 89.56(11)  | O13 | Cu7 | O14              | 81.00(11)  |
| O21 | Cu3 | N6  | 89.05(12)  | N20 | Cu8 | O5               | 93.35(10)  |
| O21 | Cu3 | N7  | 168.86(12) | N20 | Cu8 | N19              | 79.60(12)  |
| N6  | Cu3 | O19 | 110.39(11) | N19 | Cu8 | O5               | 99.59(10)  |
| N7  | Cu3 | O19 | 93.34(11)  | O7  | Cu8 | O5               | 95.98(10)  |
| N7  | Cu3 | N6  | 79.86(13)  | O7  | Cu8 | N20 <sup>1</sup> | 170.67(11) |
| O8  | Cu4 | O20 | 95.01(10)  | O7  | Cu8 | N19 <sup>1</sup> | 98.79(12)  |
| O8  | Cu4 | O18 | 100.09(9)  | O7  | Cu8 | O11              | 92.98(12)  |
| O8  | Cu4 | N2  | 95.88(11)  | O11 | Cu8 | O5               | 96.80(13)  |
| O8  | Cu4 | N1  | 162.13(11) | O11 | Cu8 | N20 <sup>1</sup> | 85.91(13)  |
| O20 | Cu4 | O18 | 93.06(10)  | O11 | Cu8 | N19 <sup>1</sup> | 158.66(15) |
| O20 | Cu4 | N2  | 169.05(11) | N14 | Cu9 | O6               | 101.14(10) |
| O20 | Cu4 | N1  | 89.73(11)  | O10 | Cu9 | O6               | 106.58(12) |
| N2  | Cu4 | O18 | 86.11(11)  | O10 | Cu9 | N14              | 148.98(13) |
| N1  | Cu4 | O18 | 96.84(10)  | O10 | Cu9 | N15              | 86.06(14)  |
| N1  | Cu4 | N2  | 79.54(12)  | O7  | Cu9 | O6               | 88.71(10)  |
| O6  | Cu5 | O8  | 104.68(9)  | O7  | Cu9 | N14              | 100.44(12) |
| O6  | Cu5 | N16 | 154.72(12) | O7  | Cu9 | O10              | 93.91(12)  |
| O6  | Cu5 | N17 | 95.15(11)  | O7  | Cu9 | N15              | 179.74(13) |
| O15 | Cu5 | O8  | 90.53(10)  | N15 | Cu9 | O6               | 91.05(11)  |
| O15 | Cu5 | O6  | 95.26(11)  | N15 | Cu9 | N14              | 79.71(13)  |

---

## References:

- [1] Handbook of X-ray photoelectron Spectroscopy, C. D. Wagner, W. M. Riggs, L. E. Davis, J. F. Moulder, G. E. Muilenberg, Perkin-Elmer Corp. 1979, 78-83.
